# Supplementary material for: A Review of Europe's Circular Economy in the Building Sector
Source: Preprints.org preprint supplement (doi:10.20944/preprints202209.0168.v1), 2022-09-13
Supplement: Supplementary file 1 [file supplementary]

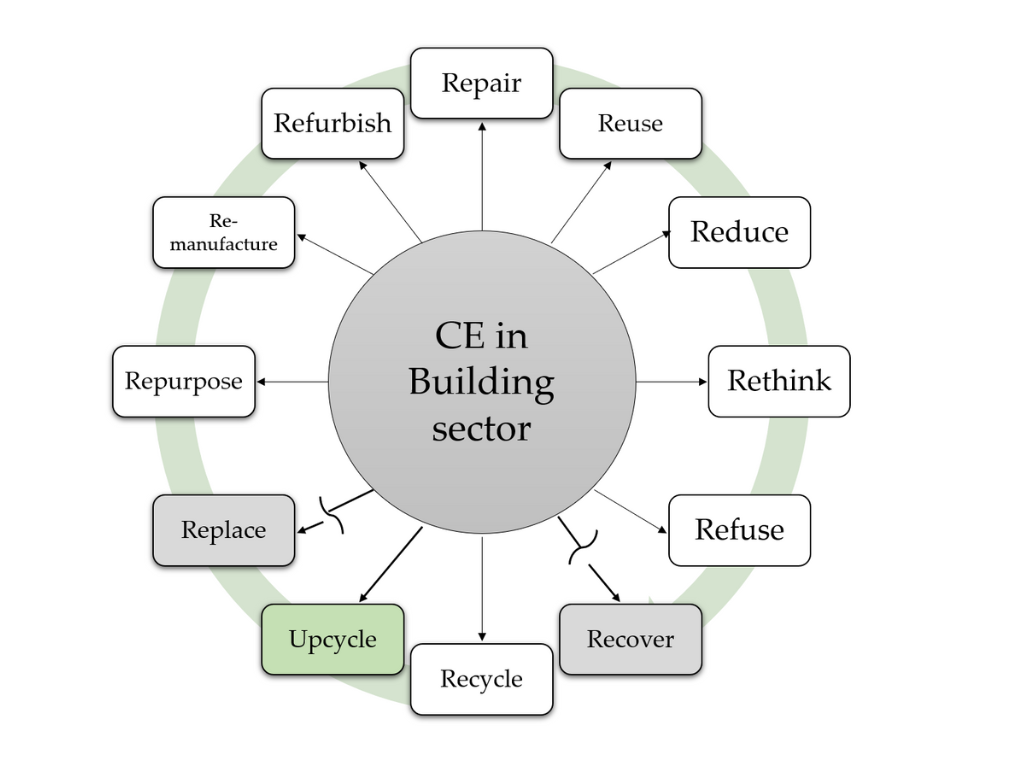


Complementary materials


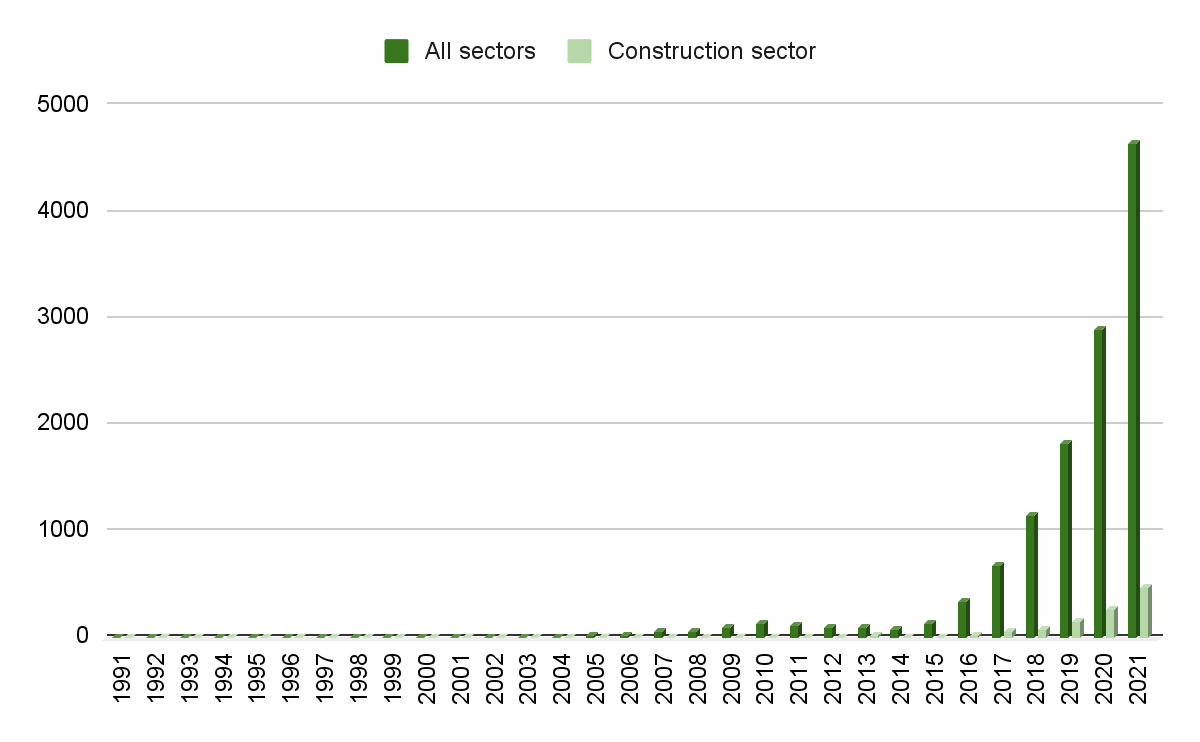


Number of publications per year in all sectors and in the construction sector via Web of Science


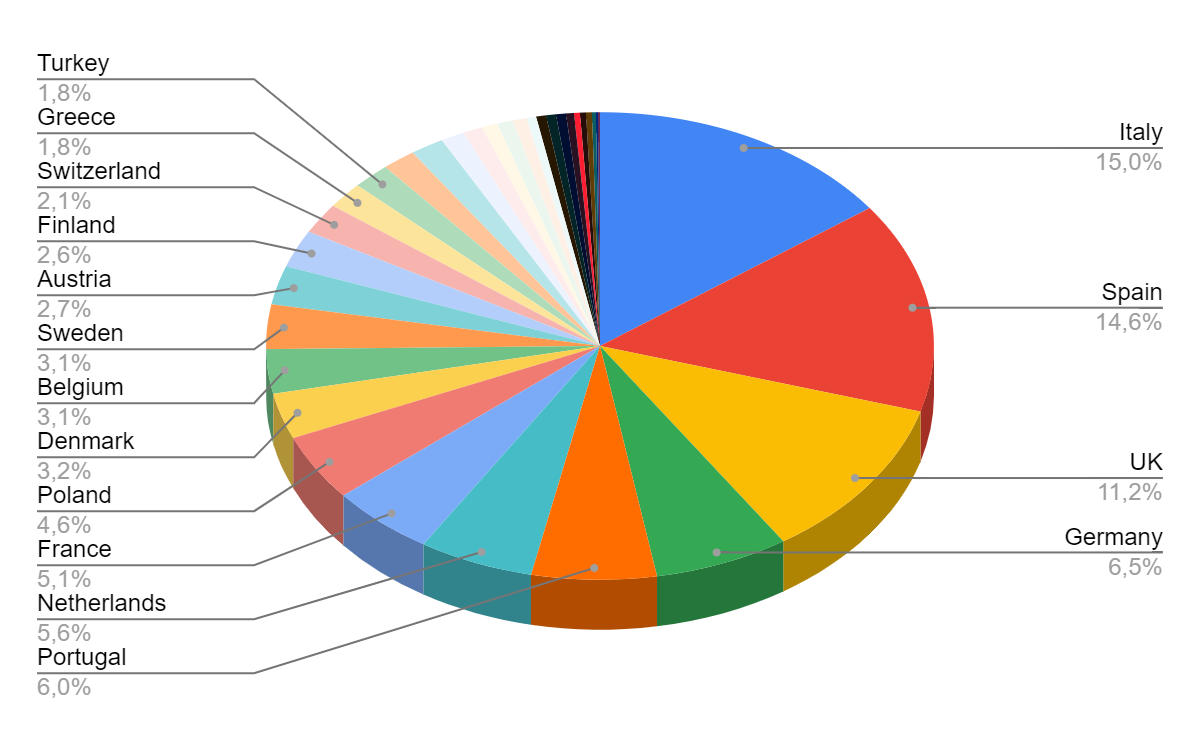


Fraction of CE publications per European country in the construction sector via Web of Science
